# Supplementary material
Source: PubMed Central journal article supplement (PMC3281183)
Supplement: supp_110829_cut-manea-1-at.pdf [file supp_110829_cut-manea-1-at.pdf]

**Appendix 1 (as supplied by authors):** Population and design features of PHQ-9 validation studies

| Study                               | Setting, instrument and language                                                                                                         | Diagnostic standard | Age, sex, sample size and % depressed                                                                                            | Quality criteria                                                                                                                  | Cut-off  |
|-------------------------------------|------------------------------------------------------------------------------------------------------------------------------------------|---------------------|----------------------------------------------------------------------------------------------------------------------------------|-----------------------------------------------------------------------------------------------------------------------------------|----------|
| Adewuya et al. <sup>34</sup>        | Nigeria, community (university students), English                                                                                        | MINI                | Age = 24.8<br>Male 58.8%<br>N = 512<br>MDD = 2.5% (n = 13)                                                                       | Sample = 1<br>Study design = 1<br>Timing = 1<br>Rater = 1<br>Blinding = ?<br>Data integrity = 1<br>Cut-off = 1<br>Translation = 1 | 8 to 12  |
| De lima Osorio et al. <sup>21</sup> | Brazil, females, primary care, Brazilian Portuguese translation                                                                          | DSM SCID            | Age = unclear<br>Male 0%<br>N = 177 MDD = 34% (n = 60)                                                                           | Sample = 0<br>Study design = 0<br>Timing = ?<br>Rater = 1<br>Blinding = ?<br>Data integrity = 1<br>Cut-off = 1<br>Translation = 1 | 10 to 21 |
| Fann et al. <sup>29</sup>           | US, inpatients with head trauma, English                                                                                                 | DSM SCID            | Age = 42<br>Male = 69.6%<br>N = 135<br>MDD = 16.3% (n = 22)                                                                      | Sample = 0<br>Study design = 1<br>Timing = 1<br>Rater = 1<br>Blinding = ?<br>Data integrity = 0<br>Cut-off = 1<br>Translation = 1 | 10       |
| Gilbody et al. <sup>6</sup>         | UK, primary care, English                                                                                                                | DSM SCID            | Age = 42.5<br>Male 22.9%<br>N = 96<br>MDD = 37.5% (n = 36)                                                                       | Sample = 0<br>Study design = 1<br>Timing = ?<br>Rater = 1<br>Blinding = 1<br>Data integrity = 1<br>Cut-off = 1<br>Translation = 1 | 9 to 13  |
| Gjerdincjen et al. <sup>35</sup>    | US, English-literate mothers registering their 0 to 1 month old infants for well-child visits, medical or paediatric clinics, US English | DSM SCID            | Age = 29.3<br>Male 0%<br>N = 438<br>MDD = 4.6% (n = 20)                                                                          | Sample = 1<br>Study design = 1<br>Timing = 1<br>Rater = 1<br>Blinding = ?<br>Data integrity = 0<br>Cut-off = 1<br>Translation = 1 | 10       |
| Grafe et al. <sup>36</sup>          | Germany, psychosomatic, walk-in clinics and family practices patients, German                                                            | DSM SCID            | Age = 41.9<br>Male 32.2 %<br>N = 528<br>MDD = 29.2% (n = 50)(psychosomatic patients),<br>MDD = 6.16% (n = 22) (medical patients) | Sample = 1<br>Study design = 1<br>Timing = ?<br>Rater = 1<br>Blinding = 1<br>Data integrity = 0<br>Cut-off = 1<br>Translation = ? | 10 to 14 |
| Kroenke et al. <sup>3</sup>         | US, internal medicine, family practice and obstetrics and gynaecology clinics, English                                                   | DSM SCID            | Age = 46 and 31<br>Male 34% and 0% N = 580<br>MDD = 7.1% (n = 41)                                                                | Sample = 1<br>Study design = 1<br>Timing = 1<br>Rater = ?<br>Blinding = 1<br>Data integrity = 0<br>Cut-off = 1<br>Translation = 1 | 9 to 15  |
| Lamers et al. <sup>23</sup>         | Netherlands, elderly primary care patients with DM and COPD, PHQ-9, Dutch                                                                | MINI                | Age = 71.4, Male = 51.8%<br>N = 713<br>MDD = 10.7% (n = 76)                                                                      | Sample = 1<br>Study design = 1<br>Timing = ?<br>Rater = 1<br>Blinding = 1<br>Data integrity = 0<br>Cut-off = 0<br>Translation = 1 | 6 to 8   |

|                               |                                                                                       |             |                                                                                      |                                                                                                                                   |                                                                            |
|-------------------------------|---------------------------------------------------------------------------------------|-------------|--------------------------------------------------------------------------------------|-----------------------------------------------------------------------------------------------------------------------------------|----------------------------------------------------------------------------|
| Lotrakul et al. <sup>24</sup> | Thailand, primary care, Thai                                                          | MINI, HAM-D | Age = 45.0, Male = 26.3%,<br>N = 279 ( gold standard - MINI)<br>MDD = 6.8% (n = 19)  | Sample = 1<br>Study design = 1<br>Timing = ?<br>Rater = 1<br>Blinding = 1<br>Data integrity = 1<br>Cut-off = 1<br>Translation = 1 | 6 to 15                                                                    |
| Lowe et al. <sup>27</sup>     | Germany, outpatient clinics and family practices, German                              | DSM SCID    | Age = 41.7<br>Male 32.9 %<br>N = 1619 (501 had SCID)<br>MDD = 13.2% (n = 66)         | Sample = 1<br>Study design = 1<br>Timing = 1<br>Rater = 1<br>Blinding = 1<br>Data integrity = 0<br>Cut-off = 0<br>Translation = 1 | 11 to 13                                                                   |
| Azah et al. <sup>25</sup>     | Malaysia, family medicine clinic, Malay                                               | CIDI        | Age = 38.7, Male = 38.3%<br>N = 180 ( gold standard - CIDI),<br>MDD = 16.6% (n = 30) | Sample = 0<br>Study design = 1<br>Timing = 1<br>Rater = ?<br>Blinding = 1<br>Data integrity = ?<br>Cut-off = 1<br>Translation = 1 | 5 to 12                                                                    |
| Patel et al. <sup>26</sup>    | India, primary care patients, Konkani (majority)/ other local languages (Goa, India). | CIS-R       | Age = 37.5<br>Male 43.6%<br>N = 598<br>MDD = 4.3% (n = 26)                           | Sample = 1<br>Study design = 1<br>Timing = ?<br>Rater = 1<br>Blinding = 1<br>Data integrity = 1<br>Cut-off = 0<br>Translation = 1 | None reported ( 7 to 15 calculated from original data supplied by authors) |
| Stafford et al. <sup>30</sup> | Australia, hospital settings (PTCA, AMI and CABG patients), English                   | MINI        | Age = 64.14<br>Male 80.8 %<br>N = 229 (193 had MINI) MDD = 18% (n = 35)              | Sample = 0<br>Study design = 1<br>Timing = 1<br>Rater = ?<br>Blinding = 1<br>Data integrity = 0<br>Cut-off = 1<br>Translation = 1 | 5, 6 and 10                                                                |
| Thombs et al. <sup>31</sup>   | US/Canada, cardiology outpatients, English                                            | DSM C-DIS   | Age = unclear<br>Male 82%<br>N = 1024<br>MDD = 22% (n = 224)                         | Sample = 1<br>Study design = 1<br>Timing = 1<br>Rater = ?<br>Blinding = 1<br>Data integrity = 0<br>Cut-off = 1<br>Translation = 1 | 4 to 10                                                                    |
| Watnick et al. <sup>33</sup>  | US, renal outpatients, English                                                        | DSM SCID    | Age = 63<br>Male 42 %<br>N = 62<br>MDD = 19% (n = 12)                                | Sample = 0<br>Study design = 1<br>Timing = 1<br>Rater = 1<br>Blinding = 1<br>Data integrity = 0<br>Cut-off = 1<br>Translation = 1 | 10                                                                         |
| Williams et al. <sup>32</sup> | US, stroke patients, English                                                          | DSM SCID    | Age = unclear<br>Male unclear %<br>N = 316<br>MDD = 33.5% (n = 106)                  | Sample = 1<br>Study design = 0<br>Timing = ?<br>Rater = ?<br>Blinding = ?<br>Data integrity = ?<br>Cut-off = 1<br>Translation = 1 | 10                                                                         |
| Wittkamp et al. <sup>27</sup> | Netherlands, primary care (high risk patients), <u>?Dutch</u>                         | DSM SCID    | Age = 49.8<br>Male 33.3%<br>N = 664 (corrected population)<br>MDD = 12.3% (n = 82)   | Sample = 1<br>Study design = 0<br>Timing = 1<br>Rater = 1<br>Blinding = 1                                                         | 10 and 15                                                                  |

|                                                                                                                                                                                                                                                                                                                                                                                                                                                                                                                                                                                                                                                                                                                                                                                                                                                                                                                                                                                                                                                                                                                                                                                                                                                                                                                                                                                                                                                                                                                                                                                                                                                                                                                                                                             |                           |                            |                                                                                              |  |                                                                                                                                   |    |
|-----------------------------------------------------------------------------------------------------------------------------------------------------------------------------------------------------------------------------------------------------------------------------------------------------------------------------------------------------------------------------------------------------------------------------------------------------------------------------------------------------------------------------------------------------------------------------------------------------------------------------------------------------------------------------------------------------------------------------------------------------------------------------------------------------------------------------------------------------------------------------------------------------------------------------------------------------------------------------------------------------------------------------------------------------------------------------------------------------------------------------------------------------------------------------------------------------------------------------------------------------------------------------------------------------------------------------------------------------------------------------------------------------------------------------------------------------------------------------------------------------------------------------------------------------------------------------------------------------------------------------------------------------------------------------------------------------------------------------------------------------------------------------|---------------------------|----------------------------|----------------------------------------------------------------------------------------------|--|-----------------------------------------------------------------------------------------------------------------------------------|----|
|                                                                                                                                                                                                                                                                                                                                                                                                                                                                                                                                                                                                                                                                                                                                                                                                                                                                                                                                                                                                                                                                                                                                                                                                                                                                                                                                                                                                                                                                                                                                                                                                                                                                                                                                                                             |                           |                            |                                                                                              |  | Data integrity = 0<br>Cut-off = 1<br>Translation = ?                                                                              |    |
| Yeung et al. <sup>28</sup>                                                                                                                                                                                                                                                                                                                                                                                                                                                                                                                                                                                                                                                                                                                                                                                                                                                                                                                                                                                                                                                                                                                                                                                                                                                                                                                                                                                                                                                                                                                                                                                                                                                                                                                                                  | US, primary care, English | Chinese Bilingual DSM SCID | Age = unclear<br>Male % unclear <i>N</i> = 1940 (184 had SCID)<br>MDD = 20% ( <i>n</i> = 37) |  | Sample = 1<br>Study design = 0<br>Timing = ?<br>Rater = 1<br>Blinding = 0<br>Data integrity = 0<br>Cut-off = 0<br>Translation = 1 | 15 |
| <p>Legend for the codes used:<br/> Sample &lt; 250 = 0; ≥ 250 = 1; unclear/ insufficient information = ?<br/> Study design double gated = 0; single gated = 1; unclear/insufficient information = ?<br/> Time between reference and index test &gt; 2 weeks = 0; ≤ 2 weeks = 1; unclear/insufficient information = ?<br/> Rater of reference test no training in use of reference test = 0; trained in use of reference test = 1; unclear/insufficient information = ?<br/> Blinding of assessor of reference test no blinding = 0; blinding = 1; unclear/insufficient information = ?<br/> Data integrity &gt; 20% drop-out/ refusal for final sample = 0, ≤ 20 % refusal/drop-out for final sample = 1, unclear/insufficient information = ?<br/> Cut-off score – validated cut-off score or tested best trade-off (by calculating various cut-offs) = 1, post hoc choice of cut-off point/ choice not justified = 0, unclear/insufficient information = ?<br/> Translation: PHQ-9 did not require translation or non-English versions of the PHQ-9 translated according to a recognised standard = 1; no details of the translation process or translation not done using a recognised standard = 0; unclear/insufficient information = ?<br/> Note:<br/> Diagnostic standards: CIDI = Composite International Diagnostic Interview, CIS-R = Revised Clinical Interview Schedule, DIS = Diagnostic Interview Schedule, MINI = Mini International Neuropsychiatric Interview, SCID = Structured Clinical Interview for DSM Disorders<br/> Study population characteristics: <i>N</i> = sample size, MDD = % diagnosed with Major Depressive Disorder using gold standard, <i>n</i> = number of patients diagnosed with Major Depressive Disorder using gold standard.</p> |                           |                            |                                                                                              |  |                                                                                                                                   |    |
