# Supplementary material
Source: PubMed Central journal article supplement (PMC3281183)

**Appendix 3 (as supplied by the authors): PHQ-9 summary ROC plot of diagnosis of major depressive disorder at cut-off  $\geq 10$**

**PHQ-9 summary ROC plot of diagnosis of major depressive disorder at cut-off  $\geq 10$ . Pooled sensitivity and specificity using a bi-variate meta-analysis .**

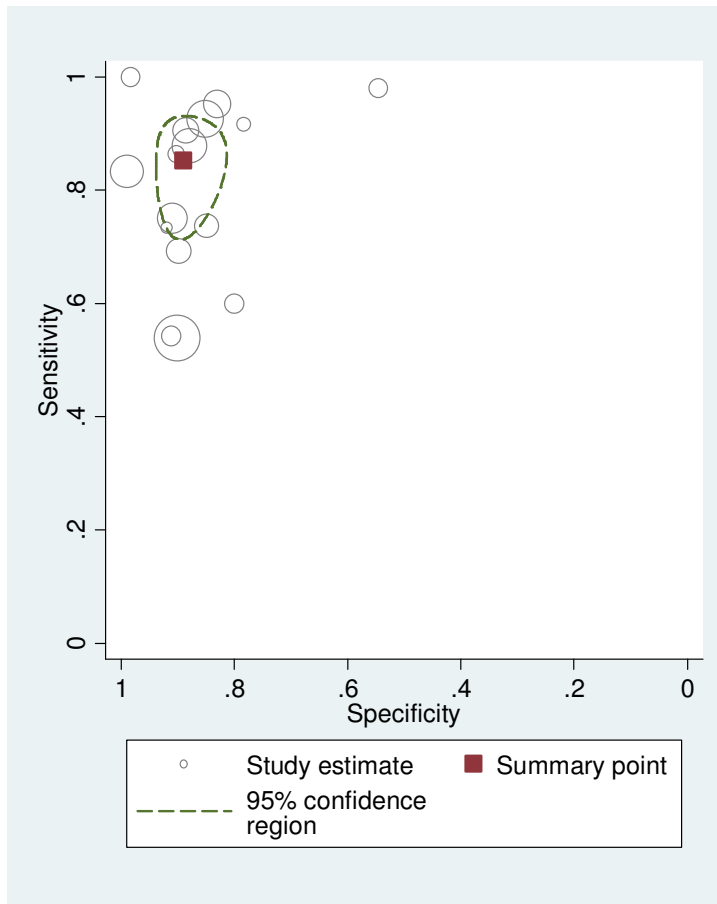

**PHQ-9 summary ROC plot of diagnosis of major depressive disorder at cut-off  $\geq 10$  – primary care studies n=6**

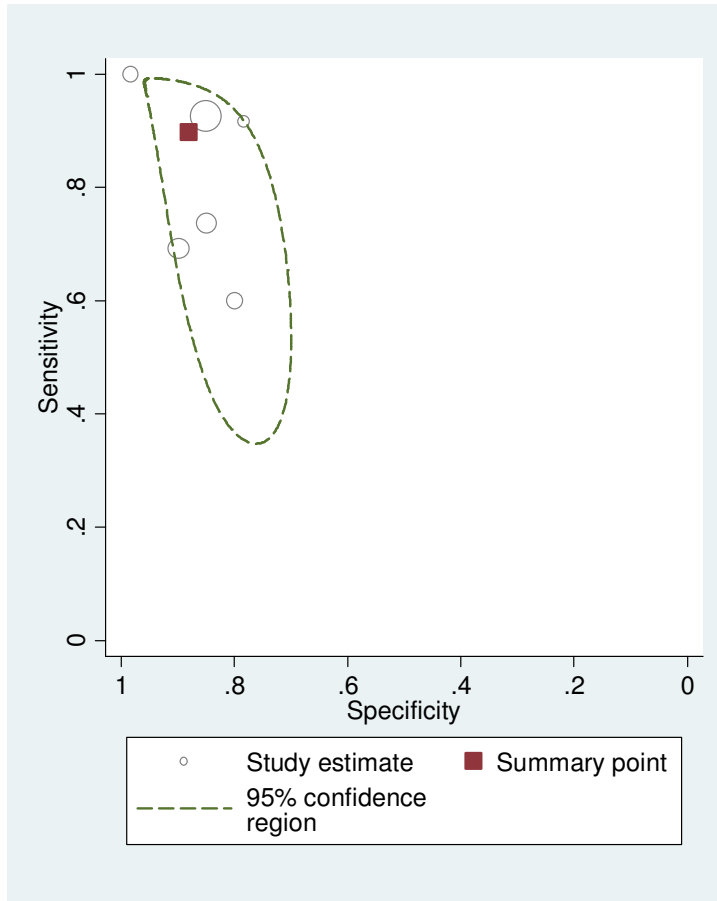

**PHQ-9 summary ROC plot of diagnosis of major depressive disorder at cut-off  $\geq 10$  – hospital studies n=5s**

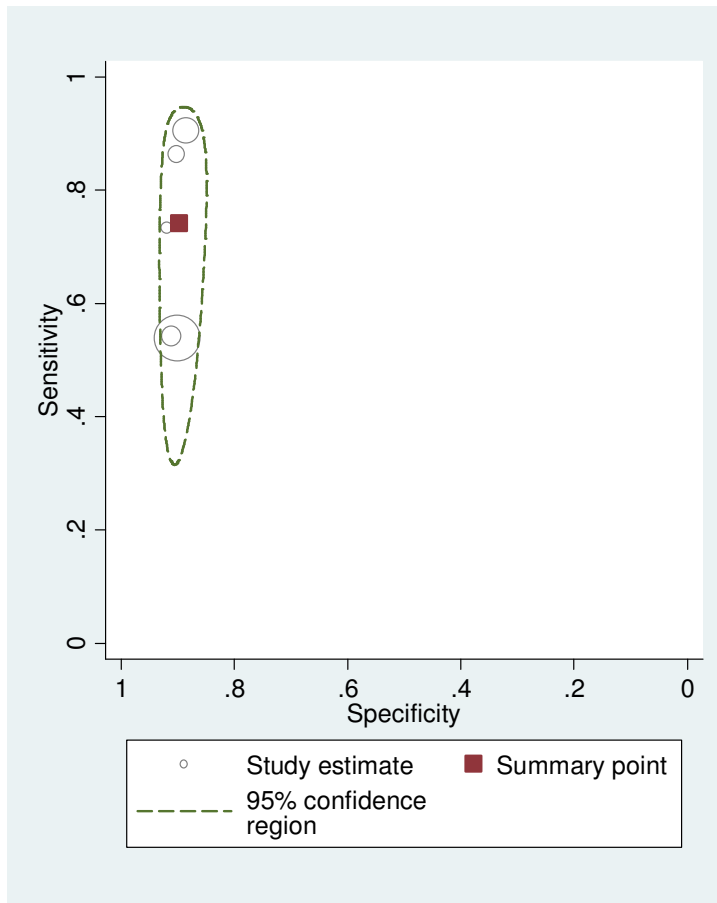

Supplement: supp_110829_cut-manea-3-at.pdf [file supp_110829_cut-manea-3-at.pdf]
